# Supplementary material for: Characterisation of maturation of photoreceptor cell subtypes during zebrafish retinal development
Source: PubMed Central journal article supplement (PMC6262866; doi:10.1242/bio.036632), 2018-09-20
Supplement: biolopen-7-036632-s1.pdf [file biolopen-7-036632-s1.pdf]

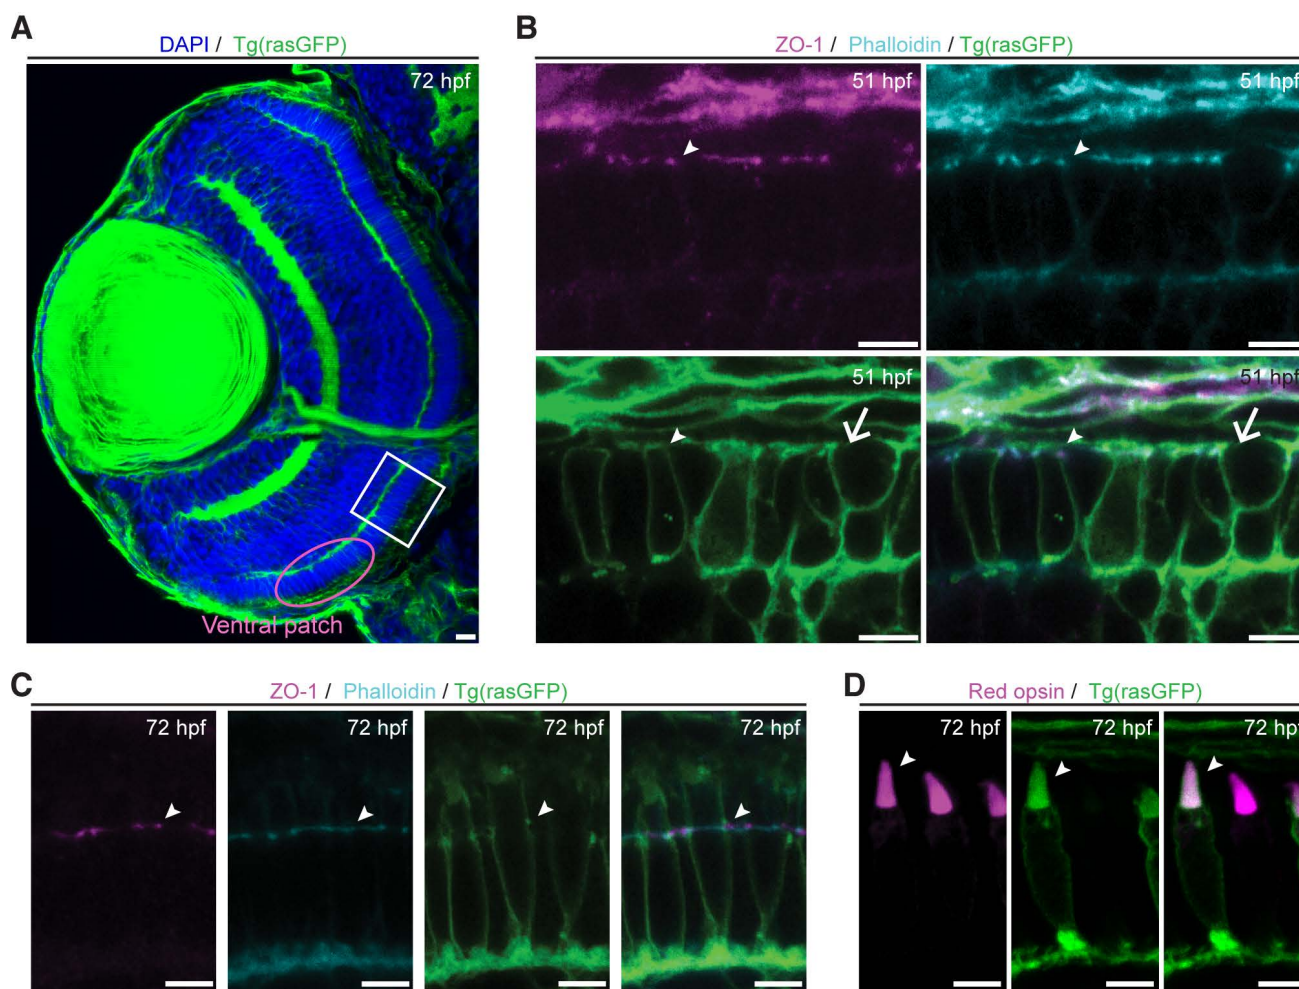

### Figure S1. - Tg(rasGFP) line as a tool to identify PRC compartments.

**A-D:** Retinal section of zebrafish Tg(rasGFP) embryos at 72 hpf, with endogenous fluorescence of membranes marked in green. **A:** Confocal image of the full zebrafish eye section with DAPI in blue. The white box ventral to the optic nerve demarcates the region from which the images shown in Fig. 1 were taken, and the magenta circle demarcates the ventral patch. **B:** Confocal image of PRCs stained with ZO-1 (magenta) and phalloidin (cyan). Arrowheads highlight junctions and arrows point to dividing cell. **C:** Fluorescent structures marked by Tg(rasGFP) (green) co-localise with ZO-1 (magenta) and phalloidin (cyan) (arrowheads), thus highlighting the junction. **D:** Endogenous fluorescence of TgBac(opn1lw1:opn1lw1-mNeonGreen/opn1lw2:opn1lw2-mKate) (magenta) highlights the OS, which overlaps with the cone-shaped structure marked by Tg(rasGFP). Arrowhead highlights OSs. Scale bars: A: 10  $\mu$ m, B-D: 5  $\mu$ m.

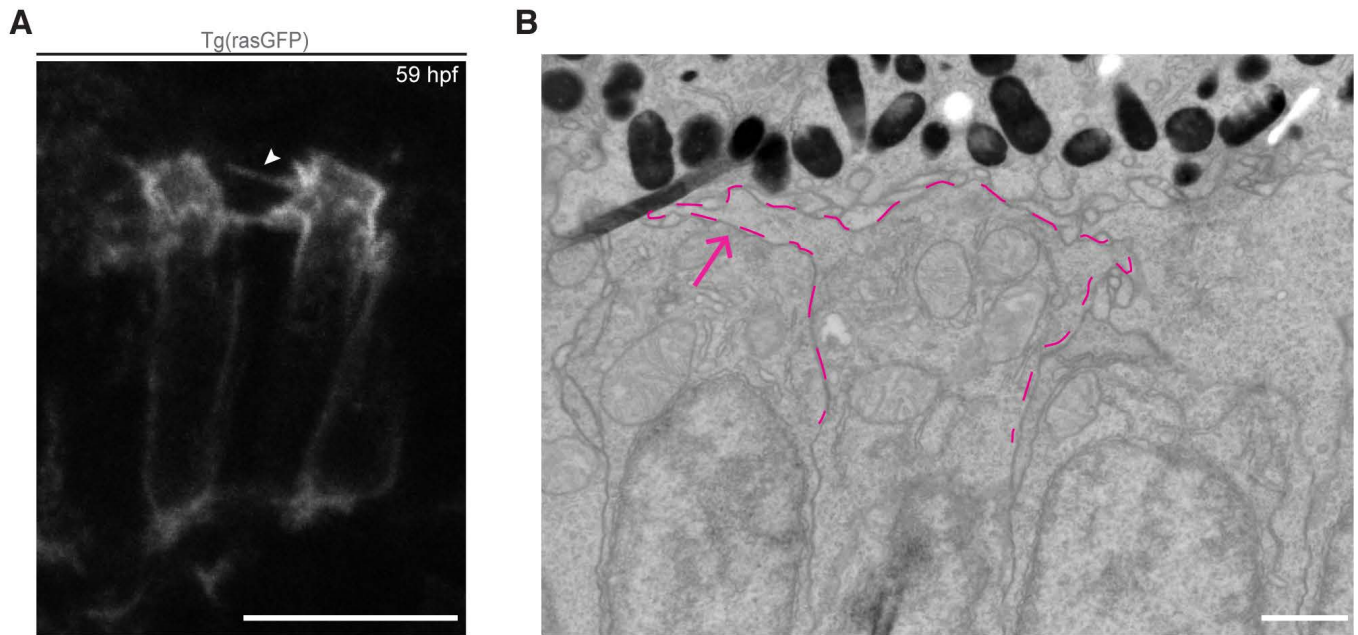

**Figure S2. - Formation of processes in the growing IS of maturing PRCs.**

**A:** Visualisation, by confocal imaging, of retinal sections of embryos at 59 hpf expressing the Tg(rasGFP) construct (plasma membrane marker). Processes (arrowhead) appear at the same time as the IS becomes visible and are still visible when OSs form. **B:** Electron micrograph of a section through the PRC layer in zebrafish embryo aged 55 hpf. The magenta dashed line highlights a process extending from the growing IS (magenta arrow). Scale bars: A: 10  $\mu$ m, B: 1  $\mu$ m.

**Table S1 – Summary of the different features associated with the different PRC maturation stages.**

| Feature                                                            | Stage of development                       |                                |                                  |                                |                                        |                               |
|--------------------------------------------------------------------|--------------------------------------------|--------------------------------|----------------------------------|--------------------------------|----------------------------------------|-------------------------------|
|                                                                    | PRC Precursors<br>~ 51 hpf                 | Stage 1<br>~55-59 hpf          | Stage 2<br>~63 hpf               | Stage 3<br>~72 hpf             | Stage 4<br>~96 hpf                     | Stage 5<br>~120 hpf           |
| <b>Growth of PRC compartments</b>                                  |                                            |                                |                                  |                                |                                        |                               |
| Cell body ( <sup>min</sup> average length <sup>max</sup> [μm])     |                                            |                                |                                  |                                |                                        |                               |
| Tg(rasGFP)                                                         | 8.1 9.7 11.1                               | 10.3 12.7 15.0                 | 11.6 13.8 15.3                   | 10.8 14.5 17.7                 | 9.7 13.6 18.0                          | 8.5 13.1 19.8                 |
| UVS                                                                | -                                          | -                              | -                                | 12.2 14.4 16.3                 | 9.7 12.5 15.7                          | 8.5 10.8 13.7                 |
| SWS                                                                | -                                          | -                              | -                                | 12.1 15.3 18.1                 | 14.9 16.6 17.6                         | 15.3 17.2 19.2                |
| LWS                                                                | -                                          | -                              | -                                | 12.3 15.0 20.0                 | 12.5 16.4 20.3                         | 13.1 18.2 22.6                |
| Rod                                                                | -                                          | -                              | -                                | 13.5 15.1 17.2                 | 14.7 17.2 21.5                         | 15.7 18.8 23.7                |
| Basal side ( <sup>min</sup> average length <sup>max</sup> [μm])    |                                            |                                |                                  |                                |                                        |                               |
| Tg(rasGFP)                                                         | -                                          | 9.2 10.7 12.2                  | 11.5 12.1 12.7                   | 7.5 10.3 12.4                  | 6.5 8.2 9.8                            | 7.5 9.1 11.9                  |
| Inner segment ( <sup>min</sup> average length <sup>max</sup> [μm]) |                                            |                                |                                  |                                |                                        |                               |
| Tg(rasGFP)                                                         | -                                          | 0.4 1.7 2.7                    | 1.2 1.9 3.2                      | 1.2 3.3 5.7                    | 1.9 4.4 8.5                            | 1.0 4.8 11.4                  |
| UVS                                                                | -                                          | -                              | -                                | 2.0 3.1 4.4                    | 2.5 3.8 6.6                            | 1.1 2.7 5.1                   |
| SWS                                                                | -                                          | -                              | -                                | 1.9 2.9 4.3                    | 4.8 5.7 6.7                            | 6.5 8.1 9.0                   |
| LWS                                                                | -                                          | -                              | -                                | 1.0 3.5 8.1                    | 3.1 5.6 8.1                            | 6.6 8.2 10.3                  |
| Rod                                                                | -                                          | -                              | -                                | 2.0 3.1 4.6                    | 4.3 6.3 8.9                            | 5.6 8.9 12.6                  |
| Outer segment ( <sup>min</sup> average length <sup>max</sup> [μm]) |                                            |                                |                                  |                                |                                        |                               |
| Tg(rasGFP)                                                         | -                                          | -                              | 0.2 0.6 0.8                      | 0.6 3.8 8.2                    | 3.7 7.9 13.1                           | 2.9 10.2 16.5                 |
| LWS                                                                | -                                          | -                              | -                                | 0.2 1.2 3.3                    | 2.5 4.4 6.1                            | 4.7 5.9 8.1                   |
| SWS                                                                | -                                          | -                              | -                                | 0.7 1.7 2.9                    | 3.2 5.2 9.4                            | 5.3 7.7 10.4                  |
| Rod                                                                | -                                          | -                              | -                                | 0.9 2.6 5.6                    | 3.8 5.3 8.1                            | 6.2 8.3 10.2                  |
| UVS                                                                | -                                          | -                              | -                                | 2.3 5.3 8.2                    | 6.4 8.8 13.1                           | 10.3 12.7 16.5                |
| Outer segment ( <sup>min</sup> average length <sup>max</sup> [μm]) |                                            |                                |                                  |                                |                                        |                               |
| LWS                                                                | -                                          | -                              | -                                | 0.8 1.2 1.8                    | 1.0 1.5 1.9                            | 1.2 1.6 2.3                   |
| SWS                                                                | -                                          | -                              | -                                | 1.0 1.3 2.0                    | 1.1 1.5 2.0                            | 1.6 2.1 3.2                   |
| UVS                                                                | -                                          | -                              | -                                | 1.0 1.3 1.7                    | 1.0 1.8 2.7                            | 1.6 2.3 3.1                   |
| Rod                                                                | -                                          | -                              | -                                | 0.9 1.6 2.8                    | 1.0 2.1 3.0                            | 2.0 2.7 3.4                   |
| <b>Cell organelles</b>                                             |                                            |                                |                                  |                                |                                        |                               |
| Mitochondria localisation                                          | -                                          | Dispersed in the apical domain | In ellipsoid region in some PRCs | Aligned in 1 row (ellipsoid)   | Aligned in 2 adjacent rows (ellipsoid) | Aligned in 3 rows (ellipsoid) |
| Rough ER clusters                                                  | -                                          | -                              | -                                | Only in Rod PRCs               |                                        | -                             |
| Nuclei position in ONL                                             | Aligned in one row (rectangular)           |                                |                                  | Initial changes in positioning | Obvious separation into 2 rows         |                               |
| Chromatin organisation                                             | Conventional Chromatin in all PRC subtypes |                                |                                  |                                |                                        | Changes in UVS cones          |
| <b>Polarity Proteins</b>                                           |                                            |                                |                                  |                                |                                        |                               |
| PrkC                                                               | Apical membrane                            |                                |                                  | Sub apical region (SAR)        |                                        |                               |
| Crb2a                                                              | Apical membrane                            | Sub apical region (SAR)        |                                  |                                |                                        |                               |
| Crb2b                                                              | -                                          | -                              | Sub apical region (SAR)          |                                |                                        |                               |
